# Supplementary material for: DNA Methylation in Offspring Conceived after Assisted Reproductive Techniques: A Systematic Review and Meta-Analysis
Source: MDPI journal article supplement (doi:10.3390/jcm11175056), 2022-08-28
Supplement: s1 [file s1]

**Supplementary Table S1.** Findings of the included studies

| Author and year         | Findings                                                                                                                                                                                                                                                                                                                                                                                                                                                                                                                                                                                                                                                                                                                                                                                                                                                        | Limits                                                                                                                                                                                                                                                                                                               |
|-------------------------|-----------------------------------------------------------------------------------------------------------------------------------------------------------------------------------------------------------------------------------------------------------------------------------------------------------------------------------------------------------------------------------------------------------------------------------------------------------------------------------------------------------------------------------------------------------------------------------------------------------------------------------------------------------------------------------------------------------------------------------------------------------------------------------------------------------------------------------------------------------------|----------------------------------------------------------------------------------------------------------------------------------------------------------------------------------------------------------------------------------------------------------------------------------------------------------------------|
| Argyraki et al., 2022   | <ul style="list-style-type: none"> <li>No difference in the methylation and expression levels of the 3 imprinted genes analyzed</li> </ul>                                                                                                                                                                                                                                                                                                                                                                                                                                                                                                                                                                                                                                                                                                                      | <ul style="list-style-type: none"> <li>Small sample size;</li> <li>No info on paternal infertility</li> <li>The difference between gender was not analyzed</li> </ul>                                                                                                                                                |
| Barbarete et al., 2021a | <ul style="list-style-type: none"> <li>Hypomethylation of <i>H19/IGF2</i> DMR in ART group than in controls confirmed with pyrosequencing</li> <li>Hypermethylation of <i>PEG3</i> DMR in ART group than in controls confirmed with pyrosequencing</li> <li>In children born by ICSI presence of hypomethylation of <i>LINE1</i> compared with IVF</li> <li>Identification of DMRs located in the promoter region of the <i>MEG3</i>, <i>BLCAP</i>, and <i>DLX5</i> genes by EPIC array</li> <li>No differences in the ART group between conception method (IVF and ICSI) and culture medium used</li> </ul>                                                                                                                                                                                                                                                    | <ul style="list-style-type: none"> <li>Small sample size</li> <li>No info on parental infertility</li> <li>Possible distant epigenetic effects considering they are 7-8 years old children</li> <li>Single or twin pregnancies were not specified</li> <li>The difference between gender was not analyzed</li> </ul> |
| Barberet et al., 2021b  | <ul style="list-style-type: none"> <li>Hypomethylation of <i>H19/IGF2</i> DMR in the fresh ET group than in the frozen ET and compared with the placenta-level control even after adjustment for maternal age, parity, sex of the unborn child, and term of pregnancies</li> <li>Hypomethylation of <i>LINE1</i> and HERV-FRD in the fresh-ET vs frozen-ET group and toward the controls even after adjustment for maternal age, parity, sex of the unborn child, and term of pregnancies</li> <li>Decreased expression of <i>LINE1</i> ORF2 in the placentas and cord blood of babies born from IVF/ICSI and fresh ET</li> <li>Reduced expression of <i>H19</i> in frozen than in fresh ET</li> <li>Methylation levels of <i>H19/IGF2</i> and HERV-FRD and the expression of <i>KCNQ1</i> were lower in the placentas from IVF than those from ICSI</li> </ul> | <ul style="list-style-type: none"> <li>Small sample size</li> <li>No info on paternal infertility</li> <li>Only a few genes analyzed</li> </ul>                                                                                                                                                                      |
| Camprubi et al., 2013   | <ul style="list-style-type: none"> <li>The methylation of DMRs was comparable in the placenta among groups</li> <li>Pyrosequencing did not detect any differences between the groups even at the level of <i>Alu Yb8</i>, <i>LINE1</i>, <math>\alpha</math>-satellite repeats, and in the promoters of the genes analyzed</li> </ul>                                                                                                                                                                                                                                                                                                                                                                                                                                                                                                                            | <ul style="list-style-type: none"> <li>Heterogeneous population</li> <li>Analysis of subgroups performed on small numbers</li> <li>No information on paternal infertility</li> <li>No information on the type of ART method used</li> </ul>                                                                          |

|                                 |                                                                                                                                                                                                                                                                                                                                                                                                                                                                                                                                                                                                                                                                                                       |                                                                                                                                                                                                                                                                                              |
|---------------------------------|-------------------------------------------------------------------------------------------------------------------------------------------------------------------------------------------------------------------------------------------------------------------------------------------------------------------------------------------------------------------------------------------------------------------------------------------------------------------------------------------------------------------------------------------------------------------------------------------------------------------------------------------------------------------------------------------------------|----------------------------------------------------------------------------------------------------------------------------------------------------------------------------------------------------------------------------------------------------------------------------------------------|
|                                 |                                                                                                                                                                                                                                                                                                                                                                                                                                                                                                                                                                                                                                                                                                       | <ul style="list-style-type: none"> <li>The difference between gender was not analyzed</li> </ul>                                                                                                                                                                                             |
| Caramaschi et al., 2011         | <ul style="list-style-type: none"> <li>After adjustment for various maternal risk factors such as age, BMI, and smoking, observed 5 CpGs hypermethylated of which 2 were located in the <i>ARRDC4</i> gene and 1 in the <i>SRD5A2</i> gene</li> <li>Association of these methylation alterations with COS</li> </ul>                                                                                                                                                                                                                                                                                                                                                                                  | <ul style="list-style-type: none"> <li>No info on paternal factor</li> <li>Poor information on the ART method used</li> <li>Single or twin pregnancies were not specified</li> <li>The difference between gender was not analyzed</li> </ul>                                                 |
| Castillo-Fernandez et al., 2017 | <ul style="list-style-type: none"> <li>41 genes have different methylation</li> <li>Observed hypomethylation of the regulatory region of <i>H19</i> even after adjustment for smoking, maternal age, birth weight</li> <li>Adjusting for the ICSI method of conception, the association with these 41 DMR genes weakens considerably</li> </ul>                                                                                                                                                                                                                                                                                                                                                       | <ul style="list-style-type: none"> <li>Small sample size;</li> <li>A role of paternal infertility cannot be excluded</li> <li>Results not extensible to single pregnancies</li> <li>The difference between gender was not analyzed</li> </ul>                                                |
| Chen et al., 2018               | <ul style="list-style-type: none"> <li>Detected hypomethylation of the <i>KvDRM1</i> promoter of <i>CDKN1C</i> and hypermethylation of the <i>H19</i> DMR</li> <li>HTR8 cells exposed to high levels of estrogen showed hypomethylation of <i>KvDRM1</i> after 24 hours and hypermethylation of <i>H19</i> DMR after 48 hours of exposition</li> </ul>                                                                                                                                                                                                                                                                                                                                                | <ul style="list-style-type: none"> <li>Used only 6 placentas from the ART group and 5 from the SC group for the methylation study</li> <li>No info on the type of ART method used</li> <li>Not excluded impact of parental infertility</li> <li>All babies delivered by C-section</li> </ul> |
| Chen et al., 2020               | <ul style="list-style-type: none"> <li>No significant difference in global methylation and histone modifications between ART and controls</li> <li>Among ART subgroups, the one most similar to the control group is the IVF-ET group</li> <li>Analysis of DMRs and DPs shows that ART can cause epigenetic changes</li> <li>IVF-ET-associated DMRs could alter pathways associated with nervous, cardiovascular, and respiratory system development</li> <li>ICSI could impact genes involved in immune and skeletal system development</li> <li>Cryopreservation could impact the GTPase/Ras system involved in the genesis of preeclampsia and several genes involved in carcinogenesis</li> </ul> | <ul style="list-style-type: none"> <li>Small sample size</li> <li>Effects on other tissues not evaluated</li> </ul>                                                                                                                                                                          |
| Choufani et al., 2018           | <ul style="list-style-type: none"> <li>No difference in DNA methylation in the ART group compared with controls</li> <li>ART group and female sex were enriched with outliers</li> <li>The ART group outliers had methylation loss of several genes such as <i>GNAS</i>, <i>SGCE</i>, <i>KCNQT1OT1</i> and <i>BLCAP/NNAT</i></li> <li>Different methylation between in vivo ART (IUI and subfertility) and in vitro ART (IVF and ICSI) subgroups</li> </ul>                                                                                                                                                                                                                                           | <ul style="list-style-type: none"> <li>Small sample size</li> <li>The effect of other procedures used in ART not analyzed</li> </ul>                                                                                                                                                         |

|                      |                                                                                                                                                                                                                                                                                                                                                                                                                                                                                                                                                                         |                                                                                                                                                                                                                                                                                        |
|----------------------|-------------------------------------------------------------------------------------------------------------------------------------------------------------------------------------------------------------------------------------------------------------------------------------------------------------------------------------------------------------------------------------------------------------------------------------------------------------------------------------------------------------------------------------------------------------------------|----------------------------------------------------------------------------------------------------------------------------------------------------------------------------------------------------------------------------------------------------------------------------------------|
|                      | <ul style="list-style-type: none"> <li>• In the <i>in vitro</i> ART subgroup methylation alteration correlated with male infertility factor and advanced paternal age</li> <li>• Network involved were: embryonic growth, maintenance of pregnancy, development of the nervous and reproductive systems</li> </ul>                                                                                                                                                                                                                                                      |                                                                                                                                                                                                                                                                                        |
| Choux et al., 2017   | <ul style="list-style-type: none"> <li>• Greater variability of DNA methylation in the cord blood and placenta of IVF/ICSI births compared with SC</li> <li>• Hypomethylation of <i>KCNQ1OT1</i>, <i>H19/IGF2</i>, <i>LINE1</i> and <i>ERVFRD1</i> in placenta of the ART group compared with SC</li> <li>• Reduced methylation of <i>H19/IGF2</i> DMR in IVF group compared with ICSI</li> <li>• No difference in expression levels of imprinted genes in placenta and cord blood</li> <li>• Increased expression of <i>ERVFRD1</i></li> </ul>                         | <ul style="list-style-type: none"> <li>• Small sample size</li> <li>• A role of parental infertility in these changes cannot be excluded</li> </ul>                                                                                                                                    |
| DeBaun et al., 2003  | <ul style="list-style-type: none"> <li>• <i>LIT1</i> hypomethylated in 5 of the 6 patients</li> <li>• 1 of 5 patients showed hypermethylation of <i>H19</i></li> <li>• 1 patient showed no methylation alteration</li> </ul>                                                                                                                                                                                                                                                                                                                                            | <ul style="list-style-type: none"> <li>• Small sample size</li> <li>• No comparison with BWS born by SC</li> <li>• No info on parental infertility</li> <li>• The difference between ART methods was not analyzed</li> <li>• The difference between gender was not analyzed</li> </ul> |
| El Hajj et al., 2017 | <ul style="list-style-type: none"> <li>• DNA methylation in children born from ICSI is no different from that of naturally conceived children</li> <li>• 4739 CpGs differently methylated even after correction for confounding factors</li> <li>• <i>ATG4C</i> hypermethylated in both the ICSI and IVF groups, but not in the controls</li> <li>• Trend in hypermethylation for <i>SNOR1</i> 14-9</li> </ul>                                                                                                                                                          | <ul style="list-style-type: none"> <li>• Small sample size</li> <li>• Analysis adjusted only for sperm concentration therefore it cannot be certain that the paternal infertility factor has been excluded</li> </ul>                                                                  |
| Estill et al., 2016  | <ul style="list-style-type: none"> <li>• FH group shows differences with the IUI and FZ groups, which instead show similar methylation patterns</li> <li>• Females present more hypermethylated clusters than males</li> <li>• In the ICSI group the imprinted genes were more often differentially methylated than in the IUI and SC group</li> <li>• Different methylation for <i>H19</i> DMR and <i>IGF2</i> DMR2 in ART groups compared to SC but not between ART groups</li> <li>• Hypomethylation in Metastable Epialleles (MEs) of ART compared to SC</li> </ul> | <ul style="list-style-type: none"> <li>• Small sample size</li> <li>• Poor information about the mother</li> <li>• Effects associated with ICSI could be attributed to parental infertility</li> <li>• Single or twin pregnancies were not specified</li> </ul>                        |

|                     |                                                                                                                                                                                                                                                                                                                                                                                                                                                                                                                           |                                                                                                                                                                                                                                                    |
|---------------------|---------------------------------------------------------------------------------------------------------------------------------------------------------------------------------------------------------------------------------------------------------------------------------------------------------------------------------------------------------------------------------------------------------------------------------------------------------------------------------------------------------------------------|----------------------------------------------------------------------------------------------------------------------------------------------------------------------------------------------------------------------------------------------------|
| Feng et al., 2011   | <ul style="list-style-type: none"> <li>• Similar imprinted gene expression levels between ART and controls</li> <li>• <i>PEG 10</i> and <i>L3MBTL</i> expression was higher and <i>PHLDA2</i> expression was lower in ART than in SC</li> <li>• Only for one case subjected to ICSI was observed loss of imprinting for <i>L3MBTL</i></li> <li>• No difference in methylation between ART and controls</li> </ul>                                                                                                         | <ul style="list-style-type: none"> <li>• Small sample size</li> <li>• Single or twin pregnancies were not specified</li> <li>• The difference between gender was not analyzed</li> </ul>                                                           |
| Ghosh et al., 2017  | <ul style="list-style-type: none"> <li>• Methylation levels were significantly different between the ART group and controls for both <i>LINE1</i> and CCGG</li> <li>• Methylation difference in <i>LINE1</i> between ART and controls present in the group cultured with 20% oxygen tension</li> <li>• Methylation difference in <i>LINE1</i> between ART and controls present in the group of patients undergoing fresh ET</li> <li>• Placentas of male children had a difference in <i>LINE1</i> methylation</li> </ul> | <ul style="list-style-type: none"> <li>• Small sample size</li> <li>• Not investigated other possible confounding factors (e.g. culture medium)</li> <li>• Not information about paternal infertility</li> </ul>                                   |
| Gomes et al., 2009  | <ul style="list-style-type: none"> <li>• Hypomethylation of the ART group at the level of <i>KvDMR1</i> compared to controls</li> <li>• In dizygotic twins the methylation levels were different</li> <li>• Excluded an influence of the underlying parental infertility and the type of method in determining these differences</li> </ul>                                                                                                                                                                               | <ul style="list-style-type: none"> <li>• Small sample size</li> <li>• The difference between gender was not analyzed</li> </ul>                                                                                                                    |
| Ji et al., 2018     | <ul style="list-style-type: none"> <li>• No difference between groups in terms of methylation of CpGs analyzed</li> </ul>                                                                                                                                                                                                                                                                                                                                                                                                 | <ul style="list-style-type: none"> <li>• Small sample size</li> <li>• Only good quality embryos used</li> <li>• No information on paternal infertility</li> <li>• SC control group missing</li> </ul>                                              |
| Jiang et al., 2022  | <ul style="list-style-type: none"> <li>• Reduced promoter methylation levels of the <i>MEG3</i> gene</li> <li>• Positive correlation between <i>MEG3</i> expression levels and blood pressure in children</li> <li>• Association between estrogen levels and expression levels of <i>MEG3</i> and ET1</li> </ul>                                                                                                                                                                                                          | <ul style="list-style-type: none"> <li>• Small sample size</li> <li>• No information about paternal infertility</li> <li>• Not analyzed difference by gender</li> <li>• Not analyzed the differences between the various ART techniques</li> </ul> |
| Katari et al., 2009 | <ul style="list-style-type: none"> <li>• Higher average levels of methylation at CpGs in cord blood and lower levels in the placenta of the IVF group compared with controls</li> <li>• For imprinted genes, 44 CpGs were differently methylated in cord blood and 29 in the placenta of the IVF group compared to controls</li> </ul>                                                                                                                                                                                    | <ul style="list-style-type: none"> <li>• Small sample size</li> <li>• No information on parental infertility</li> <li>• No correlation with ART type</li> <li>• Single or twin pregnancies were not specified</li> </ul>                           |

|                     |                                                                                                                                                                                                                                                                                                                                                                                                                                                                                                               |                                                                                                                                                                                                                                                                                                                                                                                                                                                                                   |
|---------------------|---------------------------------------------------------------------------------------------------------------------------------------------------------------------------------------------------------------------------------------------------------------------------------------------------------------------------------------------------------------------------------------------------------------------------------------------------------------------------------------------------------------|-----------------------------------------------------------------------------------------------------------------------------------------------------------------------------------------------------------------------------------------------------------------------------------------------------------------------------------------------------------------------------------------------------------------------------------------------------------------------------------|
|                     | <ul style="list-style-type: none"> <li>Observed correlation between methylation levels and expression of these genes</li> </ul>                                                                                                                                                                                                                                                                                                                                                                               | <ul style="list-style-type: none"> <li>The difference between gender was not analyzed</li> </ul>                                                                                                                                                                                                                                                                                                                                                                                  |
| Li et al., 2011     | <ul style="list-style-type: none"> <li>No difference in average methylation levels between the groups</li> <li><i>KvDMR1</i> showed a greater tendency to develop methylation aberrations</li> </ul>                                                                                                                                                                                                                                                                                                          | <ul style="list-style-type: none"> <li>Small sample size</li> <li>No info on ART type</li> <li>No info on maternal and paternal fertility</li> </ul>                                                                                                                                                                                                                                                                                                                              |
| Lim et al., 2009    | <ul style="list-style-type: none"> <li>No difference in average methylation between ART and SC-born controls</li> <li>Children with BWS born from ART had higher frequency of facial naevus flammeus and lower frequency of omphalocele</li> <li>Higher frequency of LOMs for other genes not related to 11p15.5 such as <i>ZAC</i>, <i>PEG1</i>, <i>SNRPN</i>, and <i>DLK1</i> in the post-ART group than in the ART group</li> </ul>                                                                        | <ul style="list-style-type: none"> <li>Small sample size</li> <li>Poor information on underlying parental infertility</li> <li>Not analyzed differences between ART methods</li> <li>Single or twin pregnancies were not specified</li> <li>The difference between gender was not analyzed</li> </ul>                                                                                                                                                                             |
| Litzky et al., 2017 | <ul style="list-style-type: none"> <li>Difference in expression of imprinted genes only in subfertility group, while no difference in expression between IVF and control group</li> <li>The expression levels of <i>NDN</i>, <i>GRB19</i>, and <i>CD44</i> had a direct correlation with their methylation levels</li> <li>Correlation of expression levels of these genes with birth weight</li> </ul>                                                                                                       | <ul style="list-style-type: none"> <li>Small sample size especially for IVF group</li> <li>The control group consists of AGA children, while the other two groups were SGA and LGA</li> <li>Not investigated the type of subfertility</li> </ul>                                                                                                                                                                                                                                  |
| Liu et al., 2021b   | <ul style="list-style-type: none"> <li>DMRs between ART-assisted and naturally conceived human offspring at the whole genome-wide level</li> <li>DNA methylation variations were enriched in important pathways of the immune system and nervous system</li> </ul>                                                                                                                                                                                                                                            | <ul style="list-style-type: none"> <li>Small sample size</li> <li>Lack of information on maternal and paternal infertility</li> <li>In cord blood samples not specified whether single or twin pregnancy</li> <li>The difference between gender was not analyzed</li> </ul>                                                                                                                                                                                                       |
| Loke et al., 2015   | <ul style="list-style-type: none"> <li>Hypomethylation of <i>AluYa5</i> in IVF group compared with control</li> <li>Weaker evidence of hypomethylation of <i>LINE</i></li> <li>Weak evidence of hypomethylation of ICR <i>H19/IGF2</i> in ICSI group vs controls</li> <li>Correlation between periconceptional phytic acid values and promoter methylation of <i>H19</i></li> <li>Gestational diabetes could affect methylation of <i>LINE1</i> and smoking that of <i>ALuYa5</i> and <i>LINE1</i></li> </ul> | <ul style="list-style-type: none"> <li>All maternal factors were investigated by a simple questionnaire</li> <li>No information was given about paternal infertility</li> <li>Samples were stored for a long time before analysis and this might have influenced methylation</li> <li>Because samples were collected at 72 h after birth, the effect of postnatal epigenetic changes cannot be excluded</li> <li>Results not extendable to single observed pregnancies</li> </ul> |
| Lou et al., 2018    | <ul style="list-style-type: none"> <li>In both IVF and ICSI groups observed hypomethylation of <i>H19</i> DMR, and hypermethylation of <i>IGF2</i> DMR2 and <i>SNRPN</i> DMR</li> </ul>                                                                                                                                                                                                                                                                                                                       | <ul style="list-style-type: none"> <li>Small sample size</li> <li>No SC control group</li> </ul>                                                                                                                                                                                                                                                                                                                                                                                  |

|                       |                                                                                                                                                                                                                                                                                                                                                                                                                                                                                                                                          |                                                                                                                                                                                                                                                                                    |
|-----------------------|------------------------------------------------------------------------------------------------------------------------------------------------------------------------------------------------------------------------------------------------------------------------------------------------------------------------------------------------------------------------------------------------------------------------------------------------------------------------------------------------------------------------------------------|------------------------------------------------------------------------------------------------------------------------------------------------------------------------------------------------------------------------------------------------------------------------------------|
|                       | <ul style="list-style-type: none"> <li>Only in the IVF group, high mRNA expression levels of <i>H19</i> were found</li> </ul>                                                                                                                                                                                                                                                                                                                                                                                                            | <ul style="list-style-type: none"> <li>A role of male infertility in determining hypomethylation of <i>H19</i> cannot be ruled out</li> <li>Single or twin pregnancies were not specified</li> <li>The difference between gender was not analyzed</li> </ul>                       |
| Mani et al., 2018     | <ul style="list-style-type: none"> <li>In both the IVF and SC groups, preterm infants had numerous differentially methylated CpGs</li> <li>Possibilities for the involvement of genes implicated in trophoblastic invasion and thus implantation</li> <li>Hypomethylation of the body of the gene <i>ADAMTS12</i> and hypermethylation of the promoter of <i>ADAMTS 16</i></li> <li>Knockout of these genes in EVT cells associated with reduced expression of metalloproteinases 2 and 9 critical for trophoblastic invasion</li> </ul> | <ul style="list-style-type: none"> <li>Small sample size</li> <li>Different gestational age between the groups</li> <li>No information about parental infertility</li> <li>The difference between gender was not analyzed</li> </ul>                                               |
| Manning et al., 2000  | <ul style="list-style-type: none"> <li>Adequate methylation pattern in the analyzed region</li> <li>None of the children followed for a period ranging from 5 months to 4 years developed PWS or AS</li> </ul>                                                                                                                                                                                                                                                                                                                           | <ul style="list-style-type: none"> <li>Small sample size</li> <li>No control group</li> <li>Mixed twin and singleton pregnancies</li> <li>The difference between gender was not analyzed</li> <li>Not analyzed fresh or frozen ET</li> </ul>                                       |
| Melamed et al., 2015  | <ul style="list-style-type: none"> <li>733 CpGs were significantly differentially methylated between ART and control group, with a trend toward hypomethylation.</li> <li>The regions that are more susceptible to methylation variation were those &gt; 650 bp from the TSSs and those outside the CpG islands</li> <li>The ART group generally had greater interindividual variability</li> <li>Among the genes affected by this different methylation are <i>GNAS</i> and <i>HOP</i></li> </ul>                                       | <ul style="list-style-type: none"> <li>Small sample size</li> <li>The difference between gender was not analyzed</li> <li>Results not generalizable to all ART but only to IVF;</li> </ul>                                                                                         |
| Nelissen et al., 2013 | <ul style="list-style-type: none"> <li>CTCF6 of <i>H19</i>, the isoforms of <i>MEST</i> and the promoter of <i>MEG 3</i> were hypomethylated in the ART group compared with the SC</li> <li>Only hypomethylation of <i>H19</i> was associated with a 1.3-fold increase in its expression levels</li> </ul>                                                                                                                                                                                                                               | <ul style="list-style-type: none"> <li>Small sample size</li> <li>A role of paternal infertility cannot be ruled out since most ICSIs had been done by male factor</li> <li>Not possible to compare ART methods</li> <li>The difference between gender was not analyzed</li> </ul> |
| Nelissen et al., 2014 | <ul style="list-style-type: none"> <li>839 up-regulated genes and 927 down-regulated genes were observed in the IVF/ICSI group</li> <li><i>H19</i> and <i>PHLDA2</i> had 1.3- and 1.5-fold increased expression levels respectively</li> <li>Pyrosequencing found no difference in the incidence of LOI between the two groups</li> </ul>                                                                                                                                                                                                | <ul style="list-style-type: none"> <li>Small sample size</li> <li>Not considered male infertility</li> <li>Single or twin pregnancies were not specified</li> </ul>                                                                                                                |

|                                 |                                                                                                                                                                                                                                                                                                                                                                                                                                            |                                                                                                                                                                                                                                                                                                                                                                                                                                                                                          |
|---------------------------------|--------------------------------------------------------------------------------------------------------------------------------------------------------------------------------------------------------------------------------------------------------------------------------------------------------------------------------------------------------------------------------------------------------------------------------------------|------------------------------------------------------------------------------------------------------------------------------------------------------------------------------------------------------------------------------------------------------------------------------------------------------------------------------------------------------------------------------------------------------------------------------------------------------------------------------------------|
| Novakovic et al., 2019          | <ul style="list-style-type: none"> <li>No association was found between conception with ART and altered methylation either at birth or in the adult group</li> <li>In infants, DMPs were concentrated in the DMRs of 3 genes <i>CHRNE</i>, <i>PRSS16</i>, and <i>TMEM1</i></li> <li>Different methylation of <i>CHRNE</i> was present in all groups, including IUI and GIFT</li> <li>DMRs in infants not confirmed in the adult</li> </ul> | <ul style="list-style-type: none"> <li>The difference between gender was not analyzed</li> <li>No information on paternal infertility</li> <li>The effect of postnatal epigenetic changes in the adult group cannot be ruled out</li> <li>The cohorts of infants and adults is different</li> <li>No information about parental infertility</li> <li>Single or twin pregnancies were not specified</li> <li>The difference between gender was not analyzed</li> </ul>                    |
| Oliver et al., 2012             | <ul style="list-style-type: none"> <li>No difference in the methylation of the 4 imprinted genes analyzed and the satellite 2 repeats between the ART groups and the control group</li> <li>Culture medium showed a correlation with SNRPN methylation levels</li> </ul>                                                                                                                                                                   | <ul style="list-style-type: none"> <li>Small sample size</li> <li>No information on other ART technique (e.g. fresh vs. frozen ET)</li> </ul>                                                                                                                                                                                                                                                                                                                                            |
| Penova-Vaselinovic et al., 2021 | <ul style="list-style-type: none"> <li>No difference in terms of methylation between ART and SC groups</li> <li>Within the ART group no difference in methylation based on the type of infertility or based on fresh or frozen embryo transfer</li> <li>Difference in methylation between ICSI and IVF with particular involvement of the neuroactive ligand-receptor pathway</li> </ul>                                                   | <ul style="list-style-type: none"> <li>Whole blood analyzed and therefore no specific tissue</li> <li>methylation difference can be evaluated</li> <li>Methylations in the two groups evaluated at different times and with different methods</li> <li>Since these are adolescents, epigenetic changes that occurred in the course of life cannot be ruled out</li> <li>Single or twin pregnancies were not specified</li> <li>The difference between gender was not analyzed</li> </ul> |
| Pliushch et al., 2015           | <ul style="list-style-type: none"> <li>No difference in methylation between the two groups</li> </ul>                                                                                                                                                                                                                                                                                                                                      | <ul style="list-style-type: none"> <li>Small sample size</li> <li>Analysis adjusted for several risk factors, but not considering possible paternal infertility</li> <li>No control with spontaneous births</li> <li>Single or twin pregnancies were not specified</li> <li>The difference between gender was not analyzed</li> </ul>                                                                                                                                                    |
| Puumale et al., 2012            | <ul style="list-style-type: none"> <li>No statistically significant differences between ART and SC groups</li> <li>Tendency to hypomethylation in both lymphocytes and buccal cells for <i>IGF2R</i></li> <li>Tendency to hypermethylation only in buccal cells for <i>IGF2</i> DMR0</li> </ul>                                                                                                                                            | <ul style="list-style-type: none"> <li>Twin pregnancies have not been excluded</li> <li>Population of children aged <math>\geq 7</math> years who may have epigenetic alterations due to their living environment</li> <li>Unbalanced groups</li> </ul>                                                                                                                                                                                                                                  |

|                        |                                                                                                                                                                                                                                                                                                                                                                                                                                                                                                                                                                                    |                                                                                                                                                                                                                                                                                                                                                |
|------------------------|------------------------------------------------------------------------------------------------------------------------------------------------------------------------------------------------------------------------------------------------------------------------------------------------------------------------------------------------------------------------------------------------------------------------------------------------------------------------------------------------------------------------------------------------------------------------------------|------------------------------------------------------------------------------------------------------------------------------------------------------------------------------------------------------------------------------------------------------------------------------------------------------------------------------------------------|
| Rancourt et al., 2012  | <ul style="list-style-type: none"> <li>No LOI for any of the genes analyzed between the groups</li> <li>In OI group difference in methylation of <i>H19</i> in the placenta, <i>KCNQ1</i> in cord blood, and <i>SNRPN</i> in both cord blood and placenta compared with control</li> <li>In IVF group, difference in levels of <i>H19</i>, <i>MEST</i>, and <i>SNRPN</i> in the placenta, and <i>KCNQ1</i> in cord blood</li> <li>Correlation between methylation levels of <i>H19</i> and its expression</li> </ul>                                                               | <ul style="list-style-type: none"> <li>Small sample size</li> <li>No information on type of OI</li> <li>No information on underlying parental infertility</li> <li>No information on type of ART used</li> <li>No comparison between OI and IVF</li> </ul>                                                                                     |
| Rossignol et al., 2006 | <ul style="list-style-type: none"> <li>Both ART and SC-born patients have mutations at other loci</li> <li>Presence of other mutations does not change the clinical phenotype</li> </ul>                                                                                                                                                                                                                                                                                                                                                                                           | <ul style="list-style-type: none"> <li>Small sample size</li> <li>The methylation status of the parents' gametes and thus the role of subfertility has not been evaluated</li> <li>Included both single or twin pregnancy</li> </ul>                                                                                                           |
| Sakian et al., 2015    | <ul style="list-style-type: none"> <li>Expression of <i>H19</i> increased while that of <i>IGF2</i> reduced in placentas of children born by ICSI and those of children born by IVF compared with that of children born by SC</li> <li>No difference in methylation of the 3 CpGs of the ICR1 region of <i>H19</i> between ART and SC groups</li> <li>No correlation between the expression levels of <i>H19</i> and <i>IGF2</i> and the methylation levels of <i>ICR1</i> of <i>H19</i></li> <li>Negative correlation between expression of <i>H19</i> and <i>IGF2</i></li> </ul> | <ul style="list-style-type: none"> <li>Small sample</li> <li>Mixed twin and singleton pregnancies</li> <li>The difference between gender was not analyzed Not considered parental infertility</li> <li>Only a small region of <i>H19</i> was analyzed</li> <li>No information about other ART procedures (e.g., fresh or frozen ET)</li> </ul> |
| Santos et al., 2010    | <ul style="list-style-type: none"> <li>Embryos that go through maturational arrest have an increased risk of methylation aberrations</li> <li>In blastocysts methylation and chromatin structure is conserved</li> </ul>                                                                                                                                                                                                                                                                                                                                                           | <ul style="list-style-type: none"> <li>Small sample size</li> <li>A SC control group is missing</li> <li>Impairments cannot be ruled out due to underlying parental infertility rather than ART per se</li> </ul>                                                                                                                              |
| Shi et al., 2014       | <ul style="list-style-type: none"> <li>Aberrant methylation is observed in 8% of embryos for <i>H19</i> DMR, 16.9% of embryos for <i>PEG1</i> DMR and 10.4% of embryos for <i>KvDMR1</i></li> <li>Spermatozoa used for fertilization showed no aberrations</li> </ul>                                                                                                                                                                                                                                                                                                              | <ul style="list-style-type: none"> <li>It is not possible to establish a certain role of ART in determining these aberrations since there is a lack of a comparison group</li> <li>There is no comparison with high-quality embryos</li> <li>There is no analysis that has analyzed the different ART methods</li> </ul>                       |
| Song et al., 2015      | <ul style="list-style-type: none"> <li>The study showed 11 differently methylated CpGs between the 3 groups</li> <li>7 CpGs differed between the ART group with oocyte donation and healthy controls.</li> </ul>                                                                                                                                                                                                                                                                                                                                                                   | <ul style="list-style-type: none"> <li>Small sample size</li> <li>No difference between ART methods investigated</li> </ul>                                                                                                                                                                                                                    |



|                       |                                                                                                                                                                                                                                                                                                                                                                                       |                                                                                                                                                                                                                                                                                               |
|-----------------------|---------------------------------------------------------------------------------------------------------------------------------------------------------------------------------------------------------------------------------------------------------------------------------------------------------------------------------------------------------------------------------------|-----------------------------------------------------------------------------------------------------------------------------------------------------------------------------------------------------------------------------------------------------------------------------------------------|
|                       | <ul style="list-style-type: none"> <li>12 of 18 CpGs that differed between the ART group with infertility and the control group also differed between the ART group with egg donation and the control group.</li> </ul>                                                                                                                                                               | <ul style="list-style-type: none"> <li>Not considered the treatment that donated oocytes may undergo</li> <li>The difference between gender was not analyzed</li> </ul>                                                                                                                       |
| Tierling et al., 2010 | <ul style="list-style-type: none"> <li>Higher methylation of <i>MEST</i> in IVF-born babies than in ICSI-born and SC-born babies</li> <li>This hypermethylation in the IVF group was present in both maternal blood, cord blood, and amnion/chorion tissue</li> <li>Observed a slight inverse correlation between <i>GRB10</i> DMR methylation and birth weight and length</li> </ul> | <ul style="list-style-type: none"> <li>Small sample size</li> <li>No information about parental infertility</li> <li>The difference between gender was not analyzed Not specified whether single or twin pregnancy</li> </ul>                                                                 |
| Turan et al., 2010    | <ul style="list-style-type: none"> <li>Aberrant methylation of the maternal <i>IGF2/H19</i> DMR was more common in the in vitro group</li> <li>The overall variance was significantly greater in the in vitro group</li> <li>Both <i>IGF2</i> and <i>H19</i> mRNAs levels were significantly lower in placenta from the in vitro group</li> </ul>                                     | <ul style="list-style-type: none"> <li>Small sample size</li> <li>No information about paternal infertility</li> <li>No explored differences between ART methods</li> <li>Single or twin pregnancies were not specified</li> <li>The difference between gender was not analyzed</li> </ul>    |
| Vincent et al 2016    | <ul style="list-style-type: none"> <li>The methylation of the DMR of <i>PLAGL1</i> was significantly higher in the IVF group of cord blood compared to controls and also compared to ICSI even after correction with risk factors</li> <li>The mRNA expression was also reduced in the IVF and ICSI group compared to SC even after correction for risk factors.</li> </ul>           | <ul style="list-style-type: none"> <li>Small sample size</li> <li>No information about paternal infertility</li> <li>Lack of information on ART methods (e.g. reason for which it was performed and whether fresh embryo transfer or frozen)</li> </ul>                                       |
| White et al., 2015    | <ul style="list-style-type: none"> <li>67% of embryos at day 3 and 50% of blastocysts had imprinted methylation alterations</li> </ul>                                                                                                                                                                                                                                                | <ul style="list-style-type: none"> <li>Small sample size</li> <li>Lack of SC control group</li> </ul>                                                                                                                                                                                         |
| Whitelaw et al., 2014 | <ul style="list-style-type: none"> <li>Methylation of <i>LINE1</i> in both groups increases with the age of the children</li> <li>SNRPN methylation is increased in ICSI patients and also according to the length of infertility</li> <li>The methylation within the imprinted genes does not change over the first 7 years</li> </ul>                                               | <ul style="list-style-type: none"> <li>Small sample size</li> <li>Effect not attributable with certainty to ICSI</li> <li>Other possible confounding factors not excluded</li> </ul>                                                                                                          |
| Wong et al., 2010     | <ul style="list-style-type: none"> <li>No difference in methylation of the ICR1 region of <i>H19</i> between subgroups</li> <li>No correlation between average methylation levels of this region and birth weight</li> </ul>                                                                                                                                                          | <ul style="list-style-type: none"> <li>Small sample size</li> <li>No information about parental infertility</li> <li>Only a small region of <i>H19</i> was analyzed</li> <li>The difference between gender was not analyzed</li> <li>Single or twin pregnancies were not specified</li> </ul> |
| Yoshida et al., 2013  | <ul style="list-style-type: none"> <li>No difference in methylation levels among groups</li> </ul>                                                                                                                                                                                                                                                                                    | <ul style="list-style-type: none"> <li>No information about parental infertility</li> <li>No comparison with a spontaneous conception group</li> </ul>                                                                                                                                        |

|                    |                                                                                                                                                                                                                                                           |                                                                                                                                                                                                                                                                                   |
|--------------------|-----------------------------------------------------------------------------------------------------------------------------------------------------------------------------------------------------------------------------------------------------------|-----------------------------------------------------------------------------------------------------------------------------------------------------------------------------------------------------------------------------------------------------------------------------------|
|                    |                                                                                                                                                                                                                                                           | <ul style="list-style-type: none"> <li>Unclear number of samples analyzed</li> </ul>                                                                                                                                                                                              |
| Zhang et al., 2019 | <ul style="list-style-type: none"> <li>The umbilical veins of the IVF group have a greater contractor response to AGII than the SC group</li> <li>Greater expression of <i>AGTR1</i> in turn associated with a reduced methylation of the gene</li> </ul> | <ul style="list-style-type: none"> <li>Small sample size</li> <li>No information about parental infertility</li> <li>No information on type of ART used</li> <li>Single or twin pregnancies were not specified</li> <li>The difference between gender was not analyzed</li> </ul> |

**Abbreviations.** AGA, Adequate for Gestational Age; ART, assisted reproductive technique; AS, Angelman Syndrome; BWS, Beckwith-Wiedemann syndrome; COS, controlled ovarian stimulation; DMR, Differentially Methylated Region; ET, embryo transfer; EVT, Extravillous trophoblast; FET, frozen embryo transfer; HTR8, Human Trophoblast 8; ICSI, intracytoplasmic sperm injection; IUI, intrauterine insemination; IVF, in vitro fertilization; LGA, Large for Gestational Age; LOM, Loss of Methylation; OI, ovulation induction; ORF, open reading frame; PWS, Prader Willi syndrome; SGA, Small for Gestational Age; SC, spontaneous conception, NR, not reported.

**Genes:** *ADAMTS*, ADAM Metallopeptidase With Thrombospondin Type 1 Motif 1; *AGTR1*, angiotensin II receptor type 1; *ALU*, *Arthrobacter luteus*; *ARRDC4*, Arrestin Domain Containing 4; *ATG4C*, Autophagy Related 4C Cysteine Peptidase; *BLCAP*, BLCAP Apoptosis Inducing Factor; *CDKN1C*, Cyclin-dependent kinase inhibitor 1C; *CHRNE*, Cholinergic Receptor Nicotinic Epsilon Subunit; *DLK1*, Delta Like Non-Canonical Notch Ligand 1; *DLX5*, Distal-Less Homeobox 5; *ERVFRD1*, Endogenous Retrovirus Group FRD Member 1; *GNAS*, guanine nucleotide-binding protein; *GRB10*, Growth Factor Receptor Bound Protein 10; *HERV-FRD*, Human Endogenous Retrovirus FRD; *IGF2*, insuline-like growth factor 2; *KCNQ1*, Potassium Voltage-Gated Channel Subfamily Q Member 1; *KCNQ1OT1*, *KCNQ1* Opposite Strand/Antisense Transcript 1; *KvDMR1*, Potassium Voltage Differentially Methylated Region 1; *L3MBTL*, Lethal(3) Malignant Brain Tumor-Like protein; *LINE1*, Long Interspersed Nuclear Elements 1; *LIT1*, Long QT Intronic Transcript 1; *MEG3*, Maternally Expressed Gene 3; *MEST*, Mesoderm Specific Transcript; *NDN*, Necdin; *NNAT*, neuronatin; *GNAS* antisense; *PEG1*, Paternally expressed gene 1; *PEG3*, Paternally expressed gene 3; *PEG10*, Paternally expressed gene 10; *PHLDA2*, Pleckstrin Homology Like Domain Family A Member 2; *SGCE*, Sarcoglycan Epsilon; *SNRPN*, Small Nuclear Ribonucleoprotein Polypeptide N; *ZAC*, Zinc-Activated ion Channe.
